# Supplementary material for: Influence of dextrose monohydrate on the optical properties and adsorption activity of Ni 0.6 Zn 0.2 Sb 0.2 Fe 2 O 4 nanoferrites: towards multifunctional applications
Source: Royal Society of Chemistry journal article supplement (doi:10.1039/d5ra08391e), 2026-01-01
Supplement: d5ra08391e1.pdf [file d5ra08391e1.pdf]

# **Influence of Dextrose Monohydrate on the Optical Properties and Adsorption Activity of $\text{Ni}_{0.6}\text{Zn}_{0.2}\text{Sb}_{0.2}\text{Fe}_2\text{O}_4$ Nanoferrites: Towards Multifunctional Applications**

Nourhan Mohamed Gaber <sup>1,\*</sup> , Leen W. El Khatib <sup>2</sup> , Amani Aridi <sup>3</sup>, Alaa M. Abdallah <sup>4</sup>,  
Gehan M. El-Subruiti <sup>5</sup>, Mirna Omar <sup>5,6</sup>, Sarah Omar <sup>5,6</sup>, Ramadan Awad <sup>7,8</sup>

<sup>1</sup> Department of Medical Laboratories, Faculty of Applied Health Science Technology, Pharos University in Alexandria; Canal El Mahmoudia Street, Beside Green Plaza Complex 21648, Alexandria, Egypt

<sup>2</sup> Department of Chemistry, Faculty of Science, Beirut Arab University, Beirut, Lebanon

<sup>3</sup> Public health department, Faculty of Health Sciences, Modern University for Business and Science, Beirut, Lebanon

<sup>4</sup> Physics Department, Faculty of Science, Beirut Arab University, Beirut, Lebanon

<sup>5</sup> Chemistry Department, Faculty of Science, Alexandria University, Alexandria, Egypt

<sup>6</sup> Department of Mechanical Engineering, Universiti Teknologi PETRONAS (UTP), 32610 Bandar Seri Iskandar, Perak Darul Ridzuan, Malaysia

<sup>7</sup> Physics Department, Faculty of Science, Alexandria University, Alexandria, Egypt

<sup>8</sup> Department of Basic Sciences, Faculty of Computer Science and Artificial Intelligence, Pharos University in Alexandria, Alexandria, Egypt

[\\*nourhan.gaber@pua.edu.eg](mailto:nourhan.gaber@pua.edu.eg)

## Text S1

### 3.8. Adsorption isotherm

The Freundlich isotherm is a complex model. This model considers multilayer adsorption on heterogeneous surfaces. The adsorption process is non-ideal and reversible with the presence of interaction between the adsorbed molecules. The non-linear equation of this model is described by Eq. (s1).<sup>1</sup>

$$q_e = K_F C_e^{1/n} \text{ (Freundlich),} \quad (\text{s1})$$

where  $K_F$  is the Freundlich constant and  $n$  is the adsorption intensity. The value of  $n$  gives an insight into the degree of non-linearity between the solution concentration and adsorption. If  $n = 1$ , then the adsorption is linear. If  $n < 1$  indicates that the adsorption process occurs via chemical interactions; however, if  $n > 1$ , then the adsorption takes place through a physical process.<sup>2</sup> Also, the Temkin isotherm model accounts for the adsorbate-adsorbent molecules. As an outcome of this interaction, the heat of adsorption of all molecules in the layer decreases linearly with coverage. Moreover, a uniform distribution of binding energy characterizes the adsorption.<sup>3</sup> The non-linear Temkin isotherm model is expressed in Eq. (s2).<sup>4</sup>

$$q_e = \frac{RT}{b_T} \ln (K_T C_e) \text{ (Temkin),} \quad (\text{s2})$$

where  $b_T$  is the coefficient related to the sorption heat ( $\text{J.mol}^{-1}$ ), and  $K_T$  is the equilibrium binding constant ( $\text{L.mg}^{-1}$ ). Typical adsorption energy,  $\frac{RT}{b_T} \ln (K_T)$ .  $T$  is the absolute temperature in K and  $R$  is the gas constant ( $8.314 \text{ J/mol. K}$ ).

## References

- 1 A. S. Eltaweil, A. E. Awad, E. M. Abd El-Monaem, A. M. Shaker and G. M. El-Subruiti, *J. Mol. Struct.*, 2025, **1337**, 142143.
- 2 L. Yan, L. Qin, H. Yu, S. Li, R. Shan and B. Du, *J. Mol. Liq.*, 2015, **211**, 1074–1081.
- 3 P. Senthil Kumar, S. Ramalingam, C. Senthamarai, M. Niranjanaa, P. Vijayalakshmi and S. Sivanesan, *Desalination*, 2010, **261**, 52–60.
- 4 S. Liu, H. Ouyang and Z. Wang, *Mater. Res. Express*, 2022, **9**, 075003.
